# Supplementary material for: Rack1 mediates tyrosine phosphorylation of Anxa2 by Src and promotes invasion and metastasis in drug-resistant breast cancer cells
Source: Springer Nature journal article supplement (doi:10.1186/s13058-019-1147-7), 2019-05-22
Supplement: MOESM2 [file 16742246]

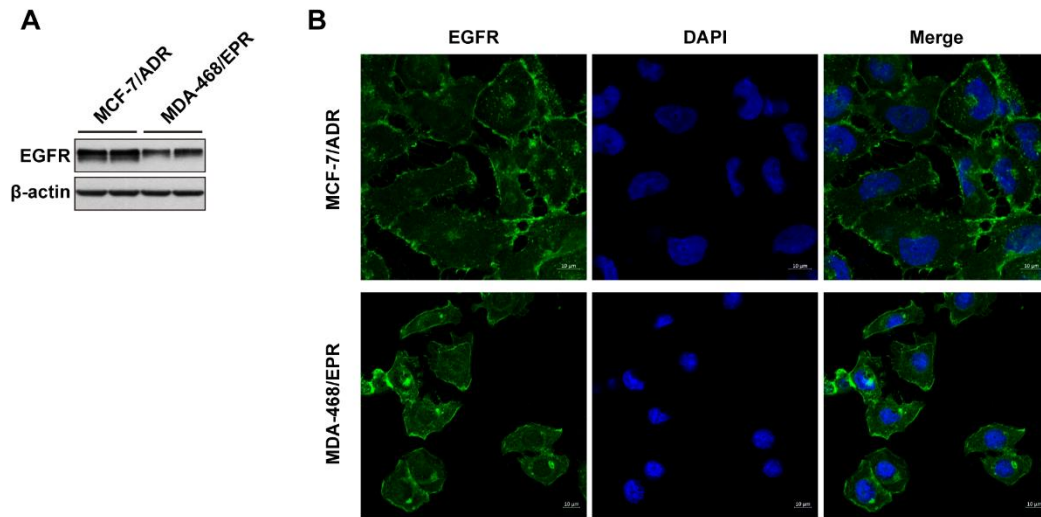

**Figure S1. The expression of EGFR was higher in MCF-7/ADR cells than in MDA-MB-468/EPR cells.** (A) Western blotting analysis showed that the expression of EGFR in MCF-7/ADR cells were higher than that in MDA-MB-468/EPR cells. (B) Confocal immunofluorescence microscopy analysis showed that the expression of EGFR in two drug-resistant cells mainly located in the cell membrane.

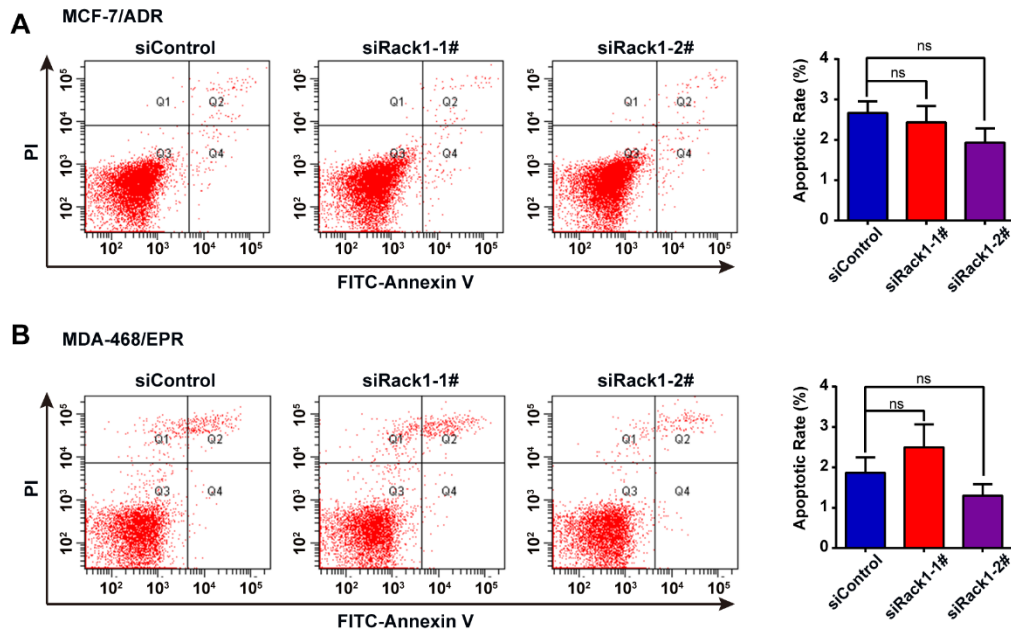

**Figure S2. Silencing the expression of Rack1 had no significant effect on apoptosis in drug-resistant cancer cells.** (A and B) Flow cytometry based apoptotic assay showed that the knockdown of Rack1 in two drug-resistant cells had no significant effect on cell death compared with that in control cells. The proportion of apoptotic cells at early stage (PI<sup>-</sup>/Annexin V<sup>+</sup>) and late stage (PI<sup>+</sup>/Annexin V<sup>+</sup>) was shown; mean  $\pm$  SD, n = 3, <sup>ns</sup>P > 0.05 versus siControl, ns means no statistical difference.

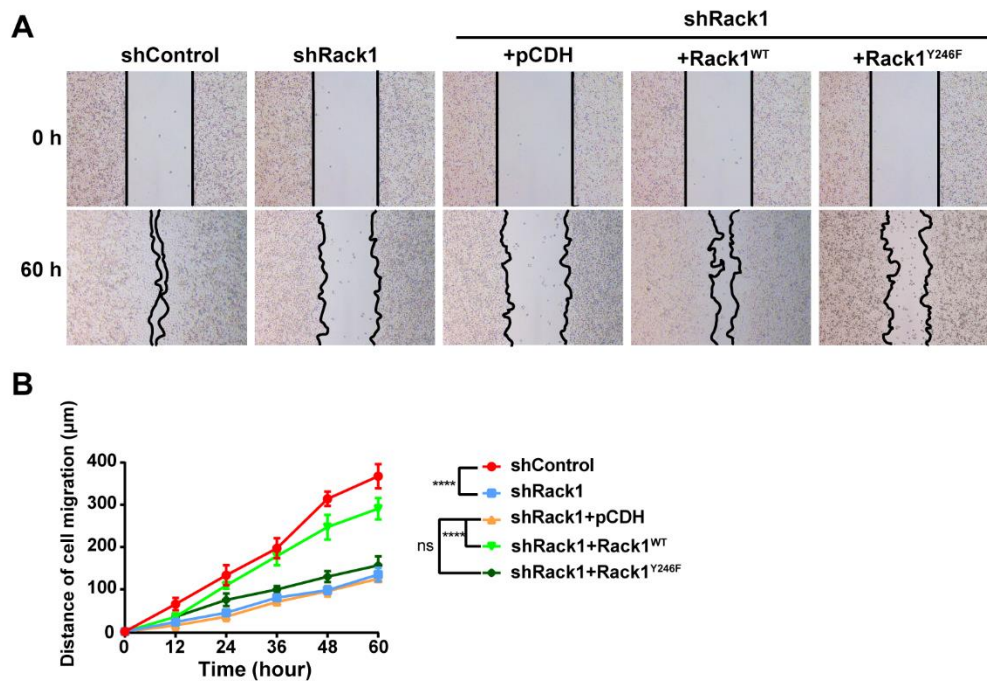

**Figure S3. Re-expression of Rack1<sup>WT</sup>, not Rack1<sup>Y246F</sup>, rescued migration ability in drug-resistant cancer cells.** (A) Wound healing assay showed that re-expression of Rack1<sup>WT</sup>, but not Rack1<sup>Y246F</sup> mutant, rescued cell migration ability in MCF-7/ADR cells. (B) The relative cell migration distance was quantified and plotted in the lower panel. Data are shown as mean  $\pm$  SD; n = 6. Statistical analysis was performed by two-way ANOVA. \*\*\* $P < 0.001$  and ns  $P > 0.05$  indicates no statistical significance.

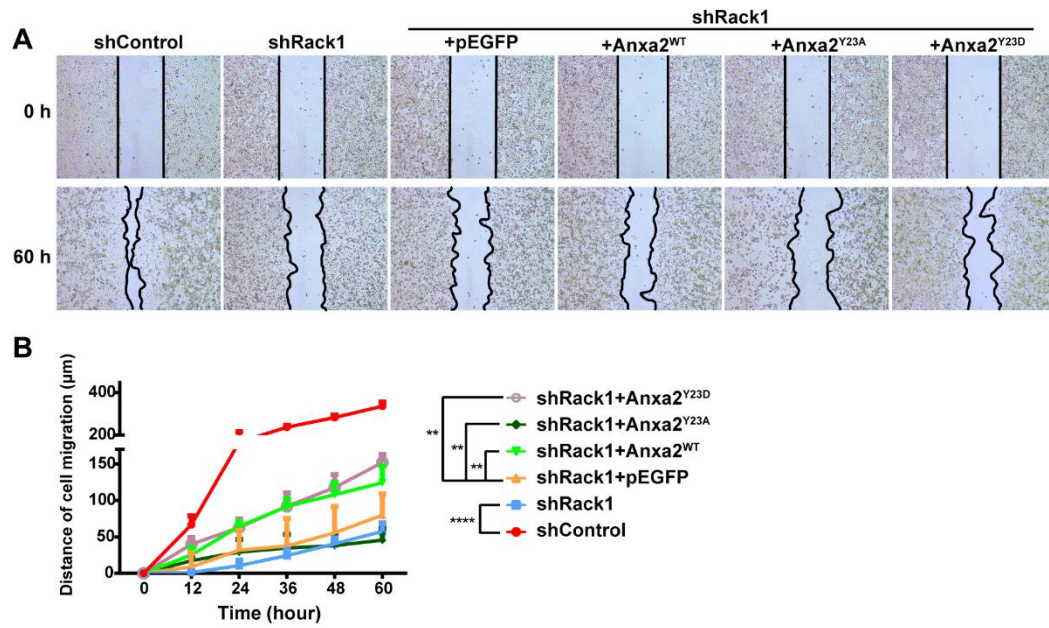

**Figure S4. Increased expression of Anxa2<sup>WT</sup> or Anxa2<sup>Y23D</sup> in Rack1-silenced cells recovered cell migration ability.** (A and B) Wound healing assay showed that the overexpression of Anxa2<sup>WT</sup> or Anxa2<sup>Y23D</sup>, not Anxa2<sup>Y23A</sup>, partially rescued the cell migration ability in Rack1 silenced MCF-7/ADR cells. Data are shown as mean  $\pm$  SD; n = 6. Statistical analysis was performed by two-way ANOVA. \*\*\*\* $P < 0.0001$  and \*\* $P < 0.01$ .

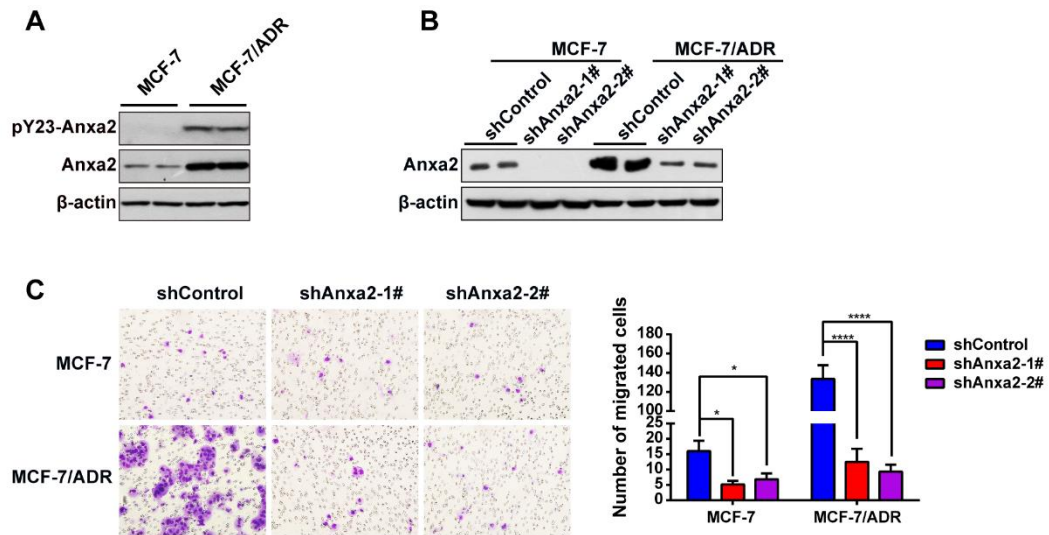

**Figure S5. Silencing of Anxa2 expression attenuates migration ability in breast cancer cells.** (A) Western blotting analysis showed that the expression of Anxa2 and pY23-Anxa2 in drug resistant MCF-7/ADR cells were elevated compared with that in MCF-7 cells. (B and C) Silencing the expression of Anxa2 in MCF-7 and MCF-7/ADR cells decreased migration ability as measured by transwell assay. Data were displayed as mean  $\pm$  SD; n = 6. Statistical analysis was performed by one-way ANOVA. \*P < 0.05, \*\*\*\*P < 0.0001 versus shControl.
